# Supplementary material for: An effective π-extended squaraine for solution-processed organic solar cells with high efficiency
Source: Royal Society of Chemistry journal article supplement (doi:10.1039/c6ta08684e), 2016-01-01
Supplement: c6ta08684e1.pdf [file c6ta08684e1.pdf]

## Electronic Supplementary Information

### **An effective $\pi$ -extended squaraine for solution-processed organic solar cell with high efficiency**

Daobin Yang,<sup>a,b</sup> Hisahiro Sasabe,<sup>\*,a</sup> Yan Jiao,<sup>b</sup> Taojun Zhuang,<sup>a</sup> Yan Huang,<sup>\*,b</sup> Xuemei Pu,<sup>b</sup> Takeshi Sano,<sup>a</sup> Zhiyun Lu,<sup>b</sup> and Junji Kido<sup>\*,a</sup>

<sup>a</sup> *Department of Organic Materials Science, Research Center for Organic Electronics (ROEL), Frontier Center for Organic Materials (FROM), Yamagata University, Yonezawa 992-8510, Japan. E-mail: h-sasabe@yz.yamagata-u.ac.jp; kid@yz.yamagata-u.ac.jp*

<sup>b</sup> *College of Chemistry, Key Laboratory of Green Chemistry and Technology of Ministry of Education, Sichuan University, Chengdu 610064, China. E-mail: huangyan@scu.edu.cn*

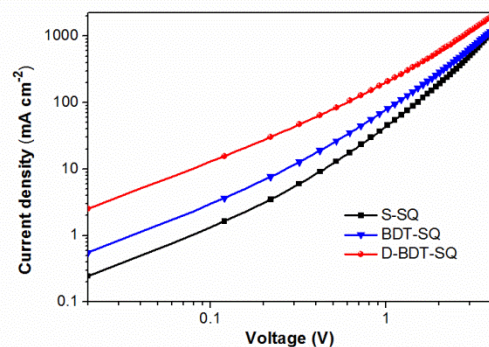

**Fig. S1**  $J$ - $V$  characteristic of the single hole-carrier devices based on neat film.

**Table S1** Photovoltaic performances of OSCs based on **D-BDT-SQ**: PC<sub>71</sub>BM blend films with different weight ratios.

| Active layer (w/ w) | $V_{oc}$           | $J_{sc}$               | FF                 | PCE <sup>a</sup>   |
|---------------------|--------------------|------------------------|--------------------|--------------------|
| Thickness (60 nm)   | (V)                | (mA cm <sup>-2</sup> ) |                    | (%)                |
| 1 : 1               | 0.88 (0.88)        | 7.77 (7.48)            | 0.38 (0.38)        | 2.60 (2.50)        |
| 1 : 3               | 0.90 (0.90)        | 11.25 (11.07)          | 0.50 (0.50)        | 5.06 (4.98)        |
| 1 : 5               | 0.90 (0.90)        | 11.90 (11.76)          | 0.50 (0.50)        | 5.35 (5.29)        |
| 1 : 6               | 0.92 (0.92)        | 11.85 (11.54)          | 0.51 (0.50)        | 5.56 (5.31)        |
| <b>1 : 7</b>        | <b>0.91 (0.91)</b> | <b>11.75 (11.53)</b>   | <b>0.52 (0.52)</b> | <b>5.56 (5.46)</b> |
| 1 : 8               | 0.92 (0.92)        | 11.27 (11.16)          | 0.51 (0.51)        | 5.29 (5.24)        |
| 1 : 9               | 0.93 (0.93)        | 10.93 (10.74)          | 0.51 (0.51)        | 5.18 (5.09)        |

<sup>a</sup> Average values of 8 individual cells were given in parentheses.

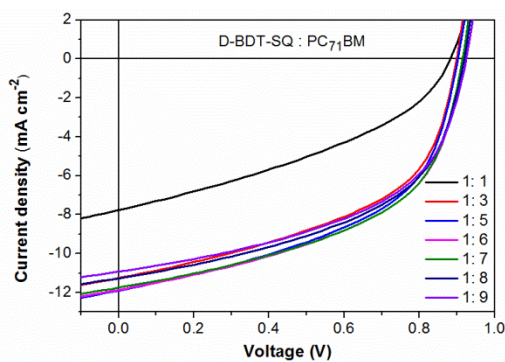

**Fig. S2**  $J$ - $V$  curve of OSCs devices based on **D-BDT-SQ**: PC<sub>71</sub>BM blend films with different weight ratios.

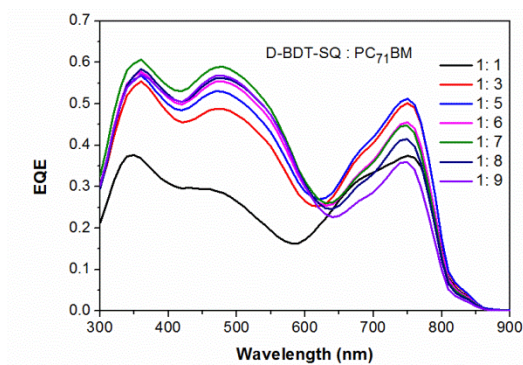

**Fig. S3** EQE curve of OSCs devices based on **D-BDT-SQ: PC<sub>71</sub>BM** blend films with different weight ratios.

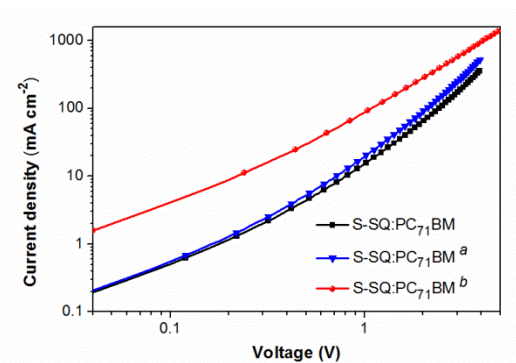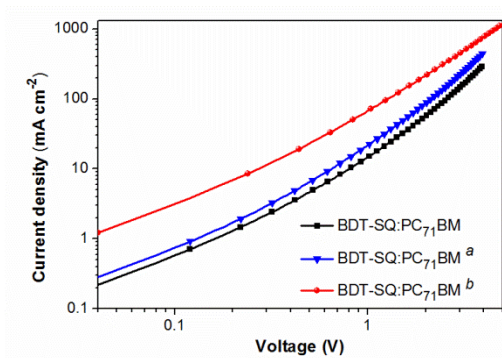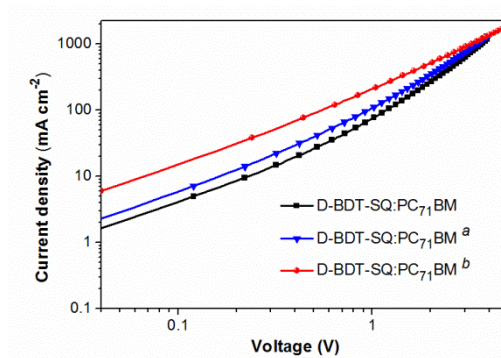

**Fig. S4** *J-V* characteristic of the single hole-carrier devices based on SM:PC<sub>71</sub>BM (1:7) blend film. <sup>a</sup> Thermally annealed devices (80 °C for 15 min). <sup>b</sup> Thermally tested devices (at 80 °C).

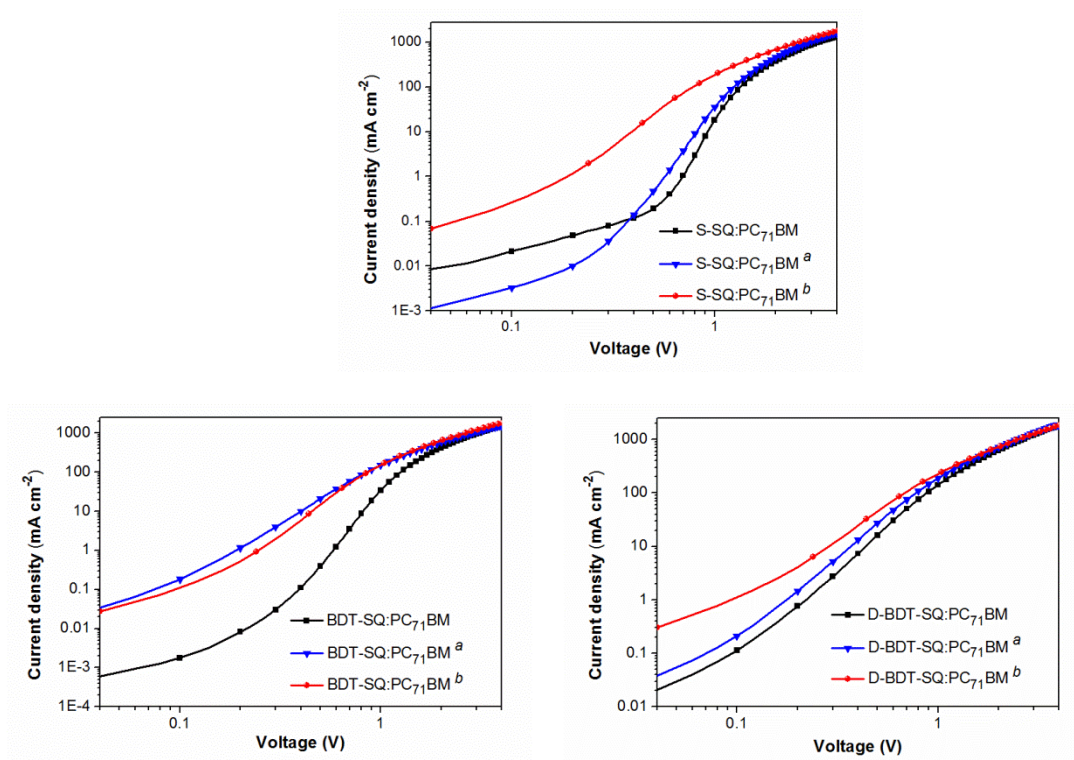

**Fig. S5**  $J$ - $V$  characteristic of the single electron-carrier devices based on SM:PC<sub>71</sub>BM (1:7) blend film. <sup>a</sup> Thermally annealed devices (80 °C for 15 min). <sup>b</sup> Thermally tested devices (at 80 °C).

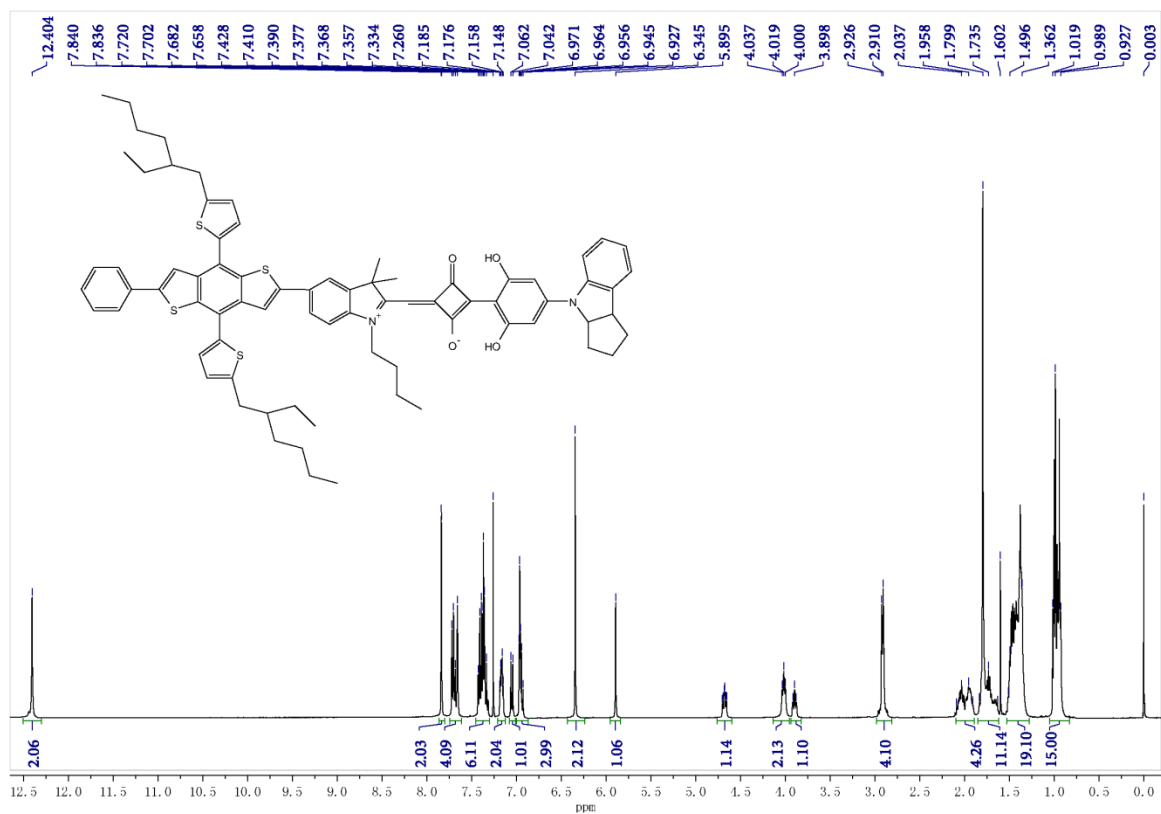

**Fig. S6**  $^1\text{H}$  NMR spectra of BDT-SQ

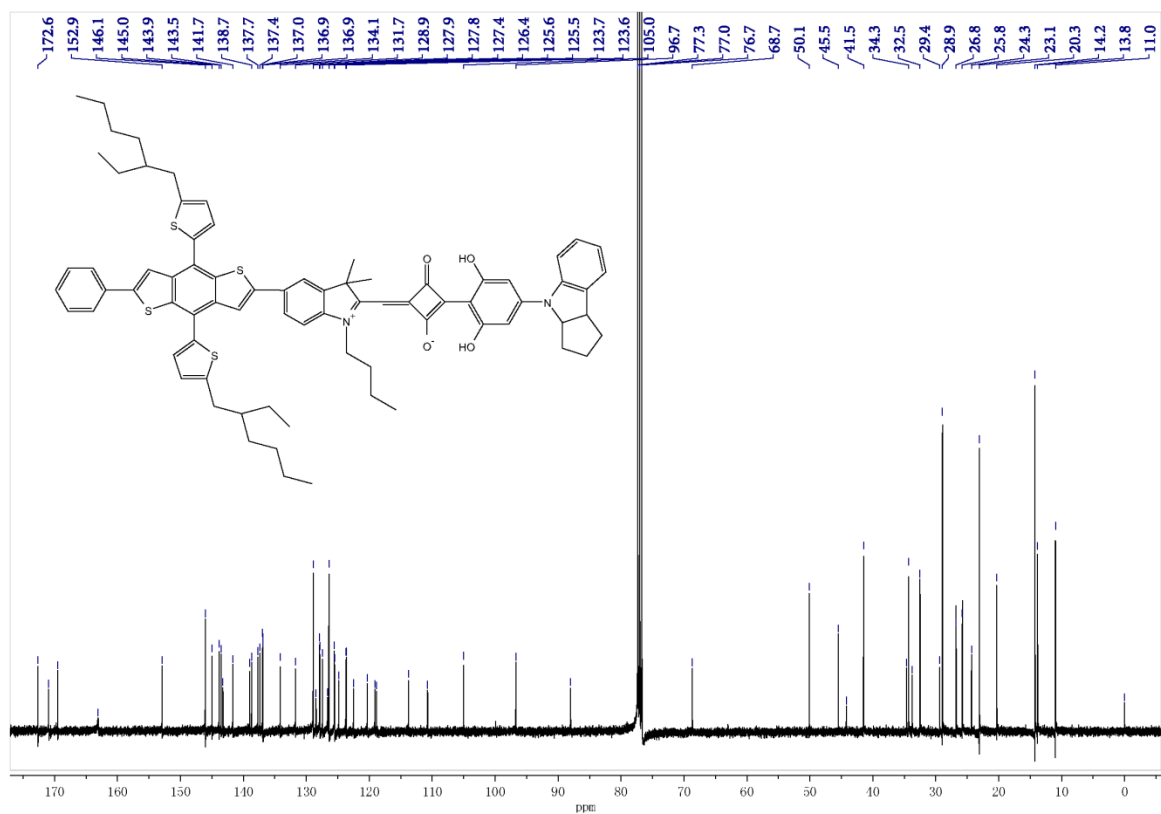

**Fig. S7**  $^{13}\text{C}$  NMR spectra of BDT-SQ

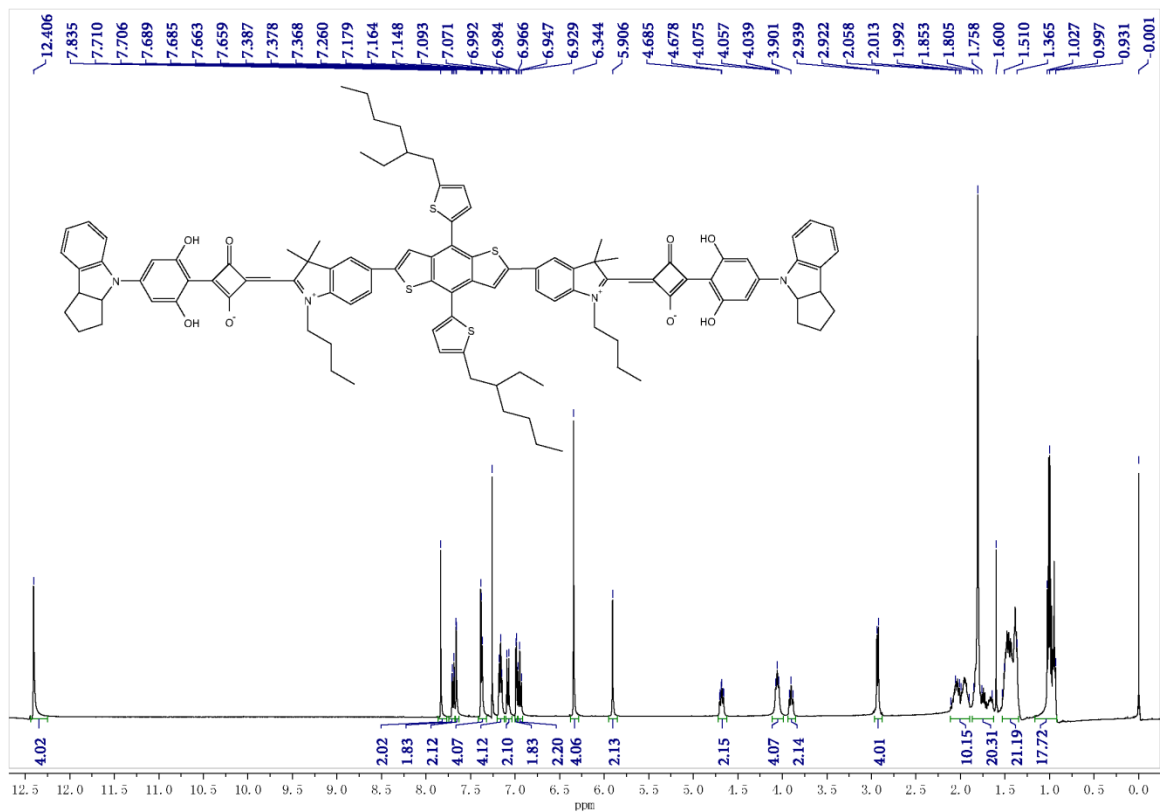

Fig. S8  $^1\text{H}$  NMR spectra of D-BDT-SQ

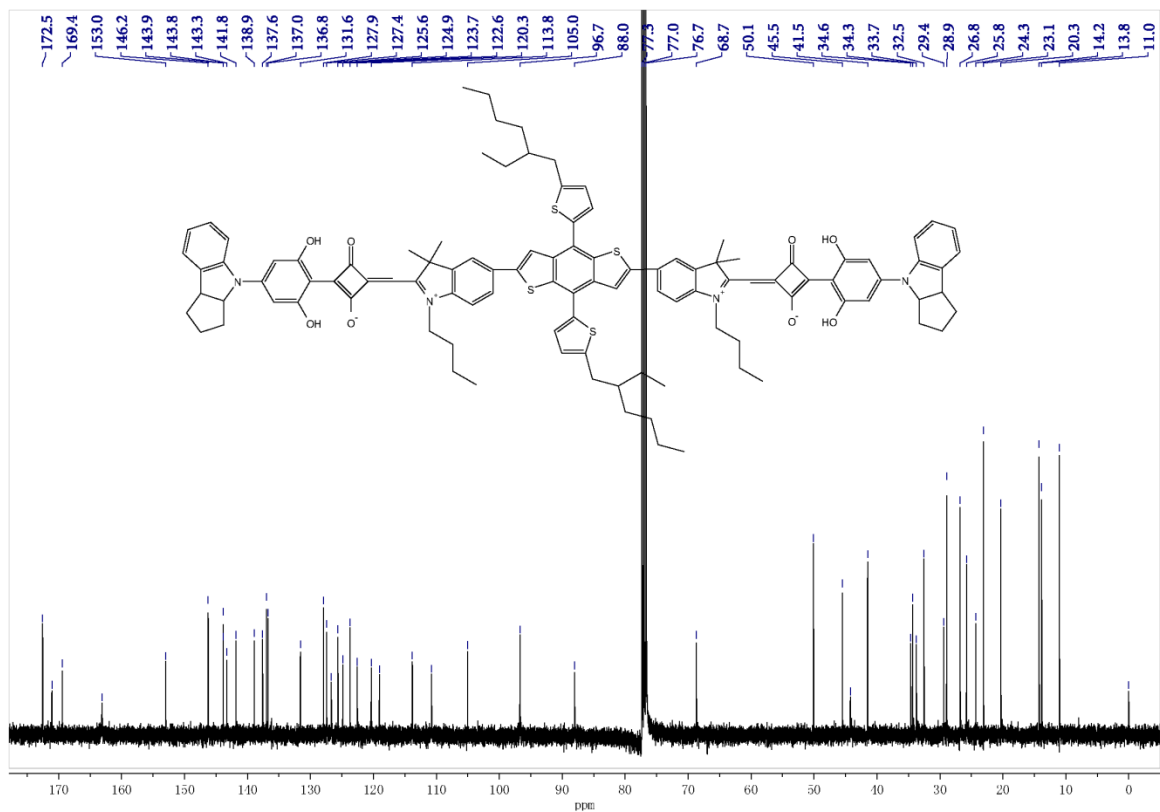

Fig. S9  $^{13}\text{C}$  NMR spectra of D-BDT-SQ
